# Supplementary material
Source: PubMed Central journal article supplement (PMC4035305)

# Supplemental Figure 1

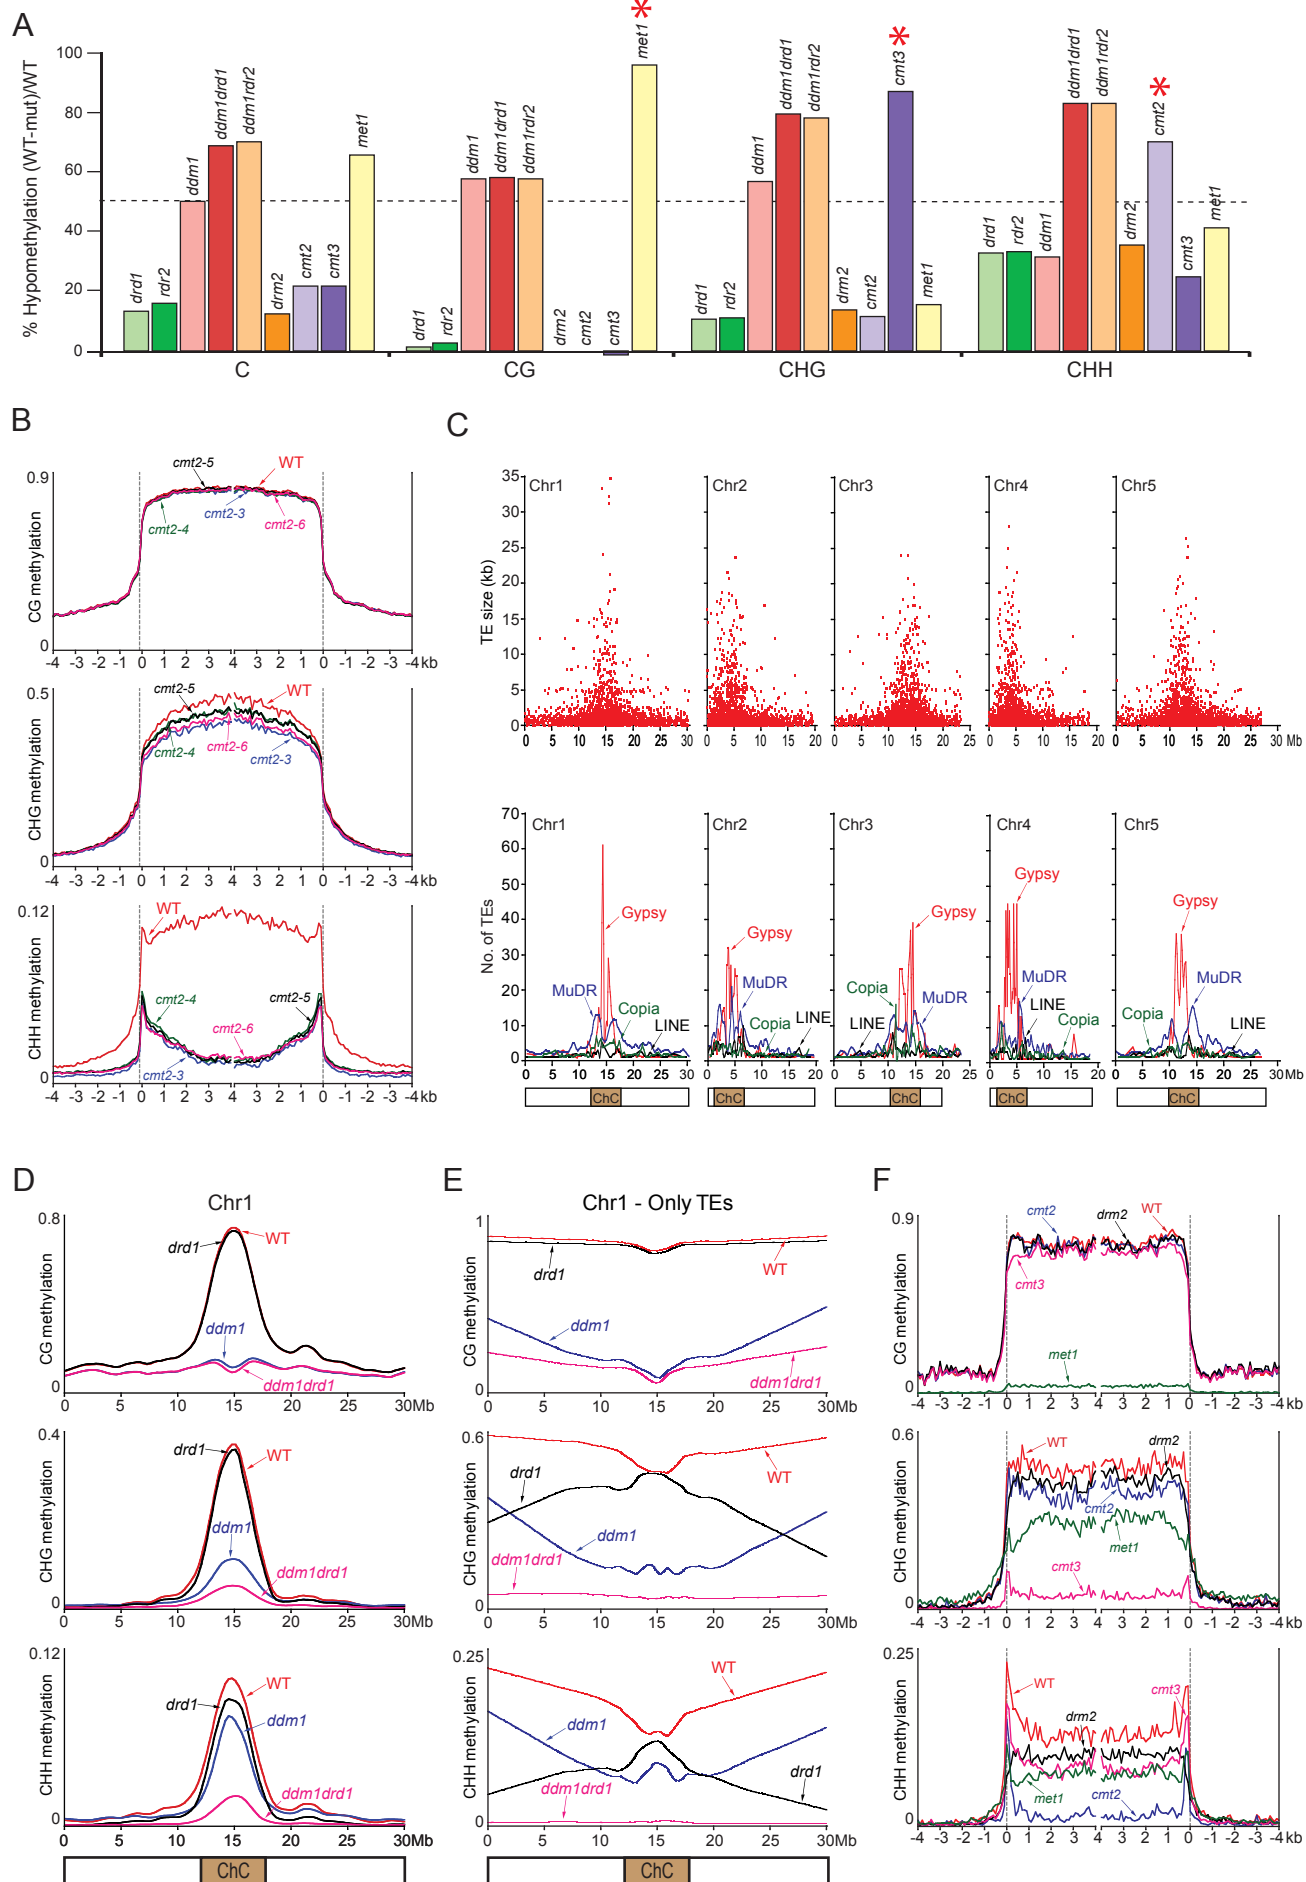

# Supplemental Figure 2

**A**

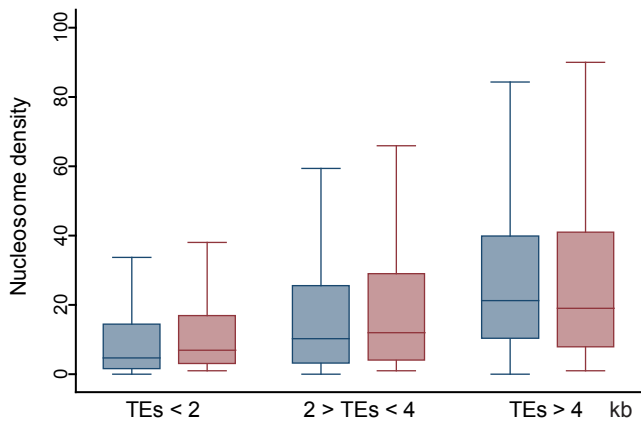

**B**

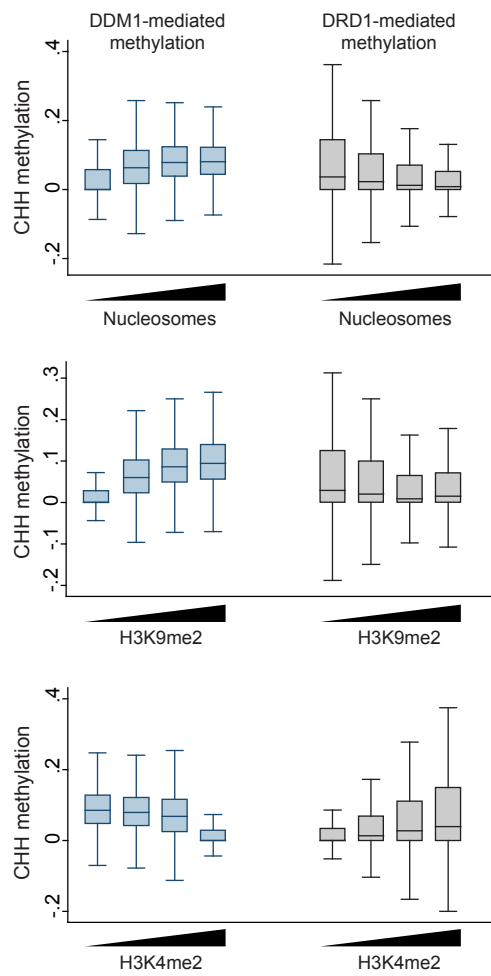

**D**

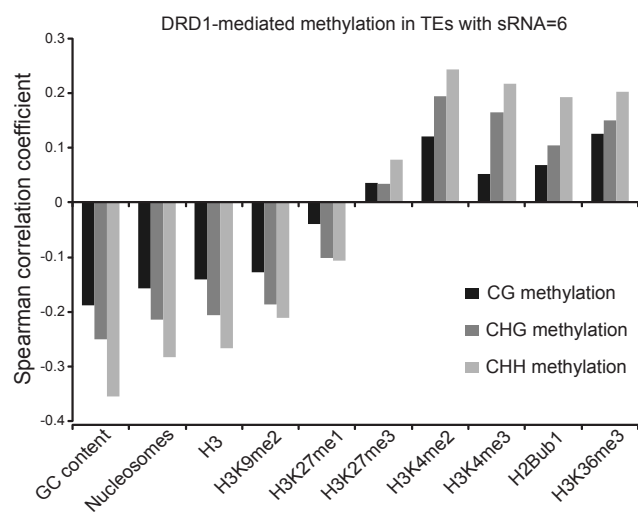

**C**

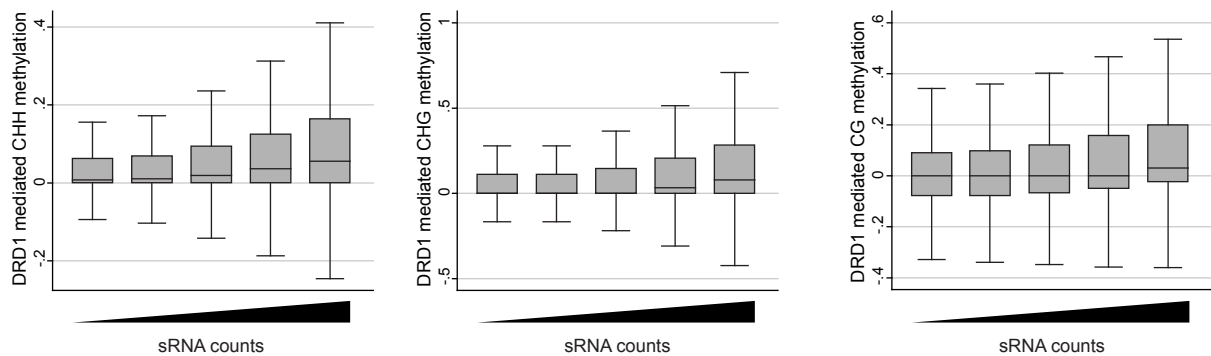

**Supplemental Figure 3**

**A**

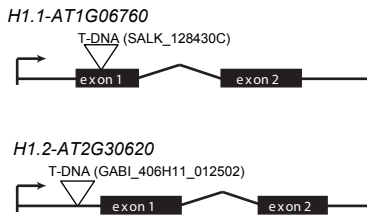

**B**

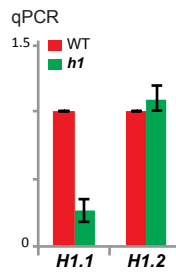

**C**

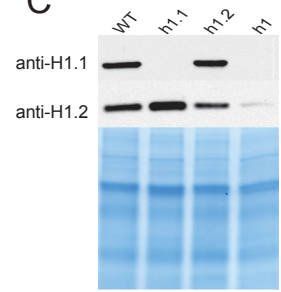

**D**

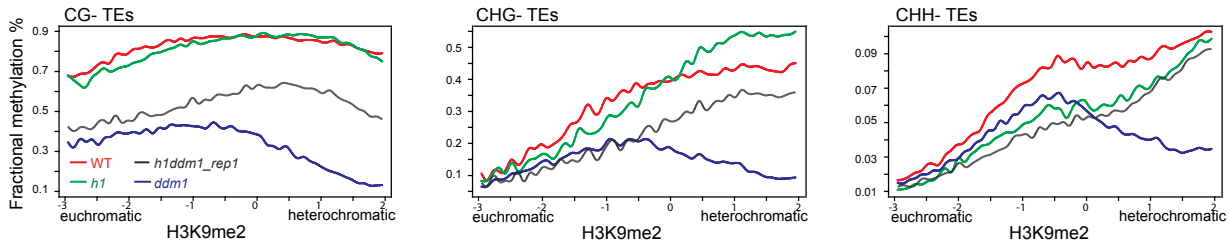

**E**

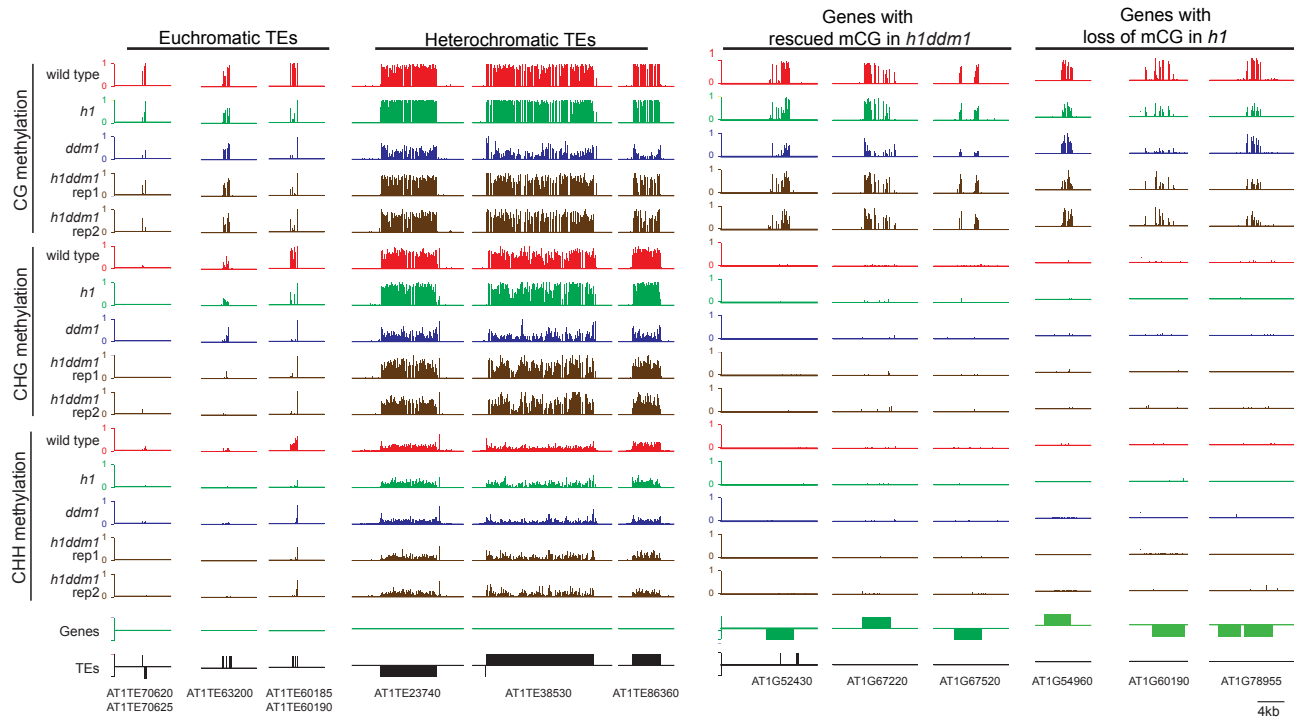

**Supplemental Figure 4**

**Gypsy**

**MuDR**

**Copia**

**LINE**

**A**

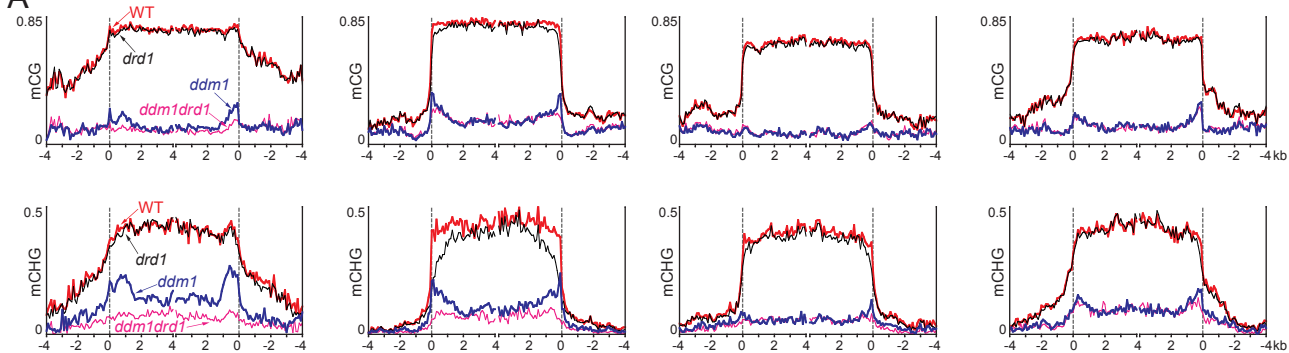

**B**

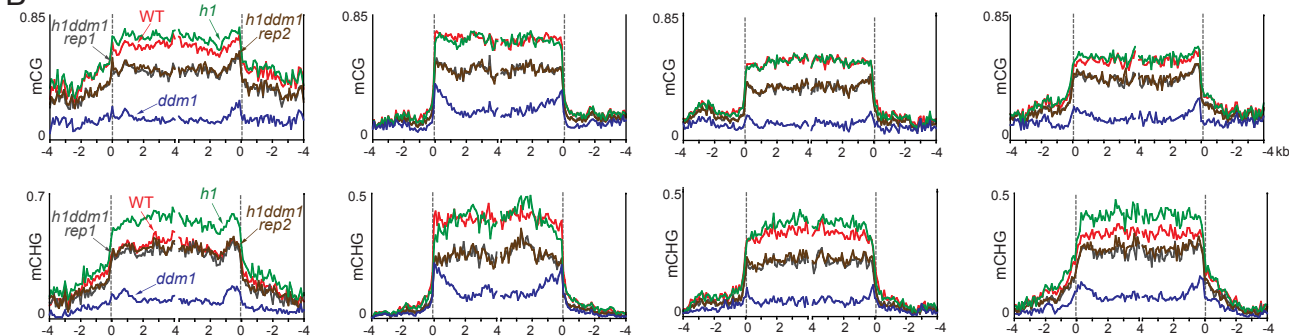

# Supplemental Figure 5

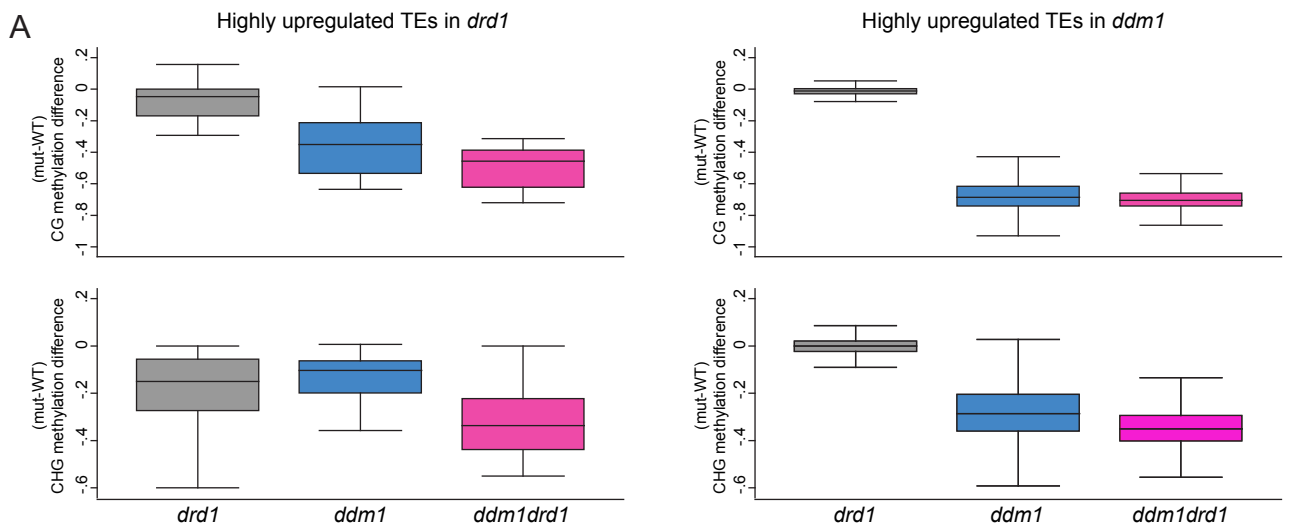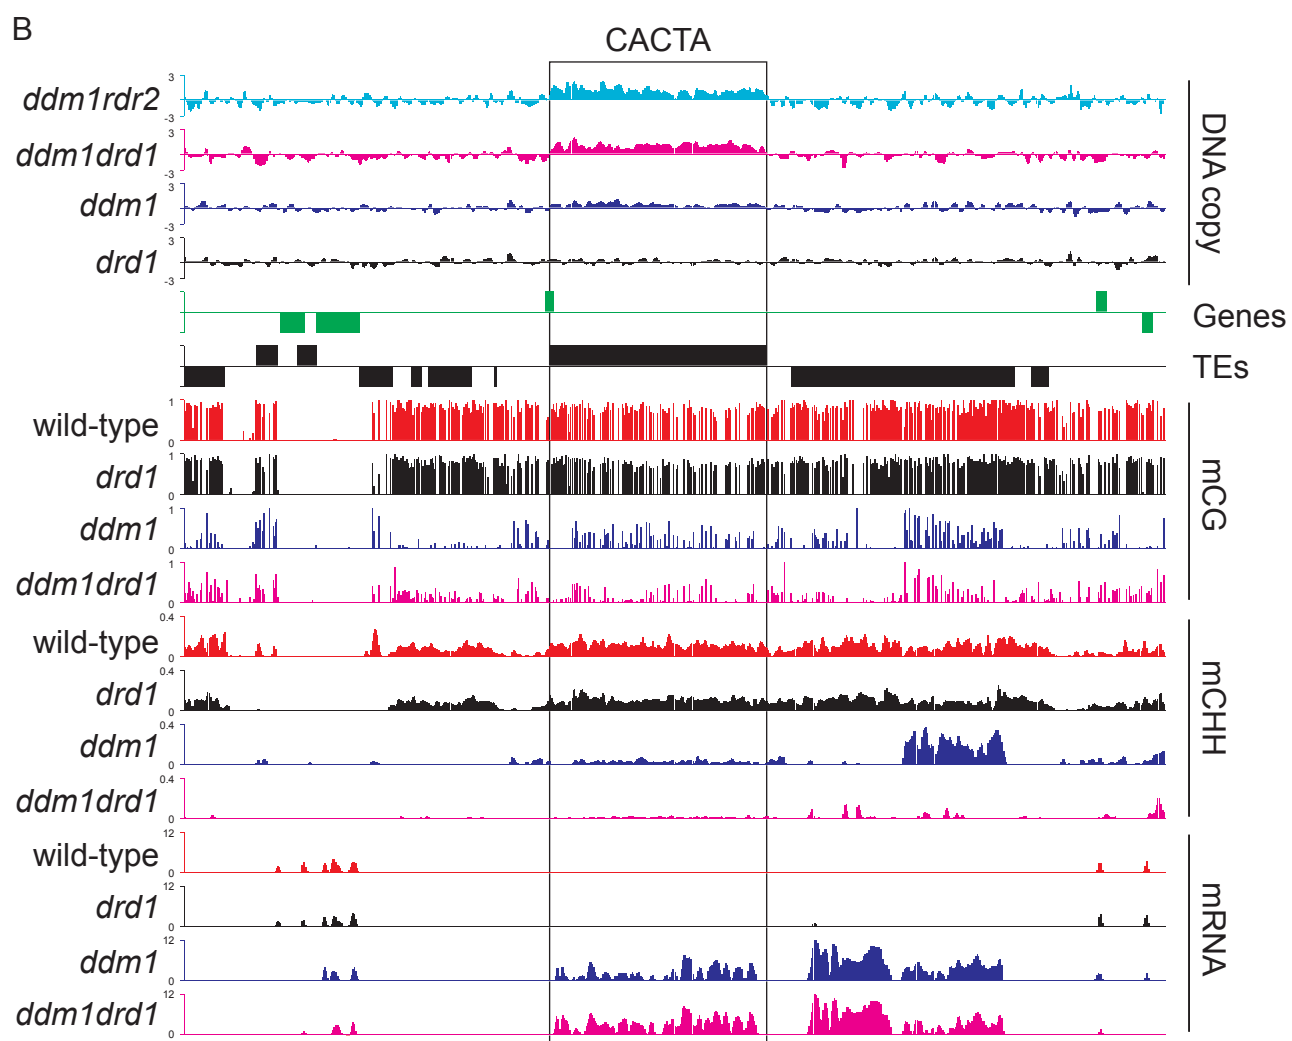

**Supplemental Figure 6**

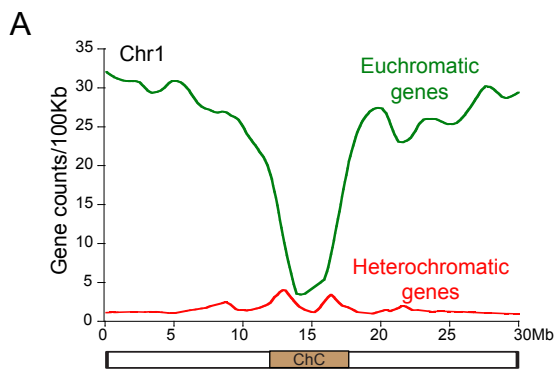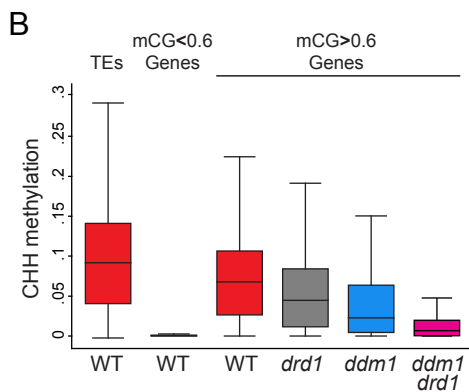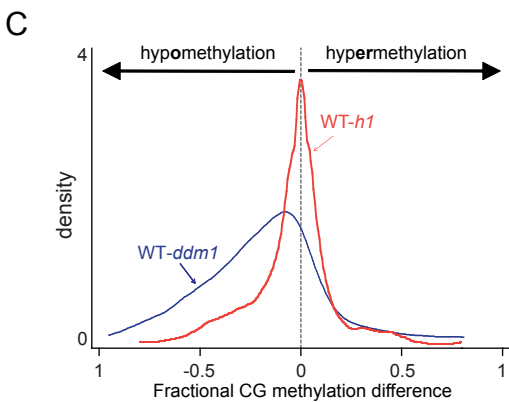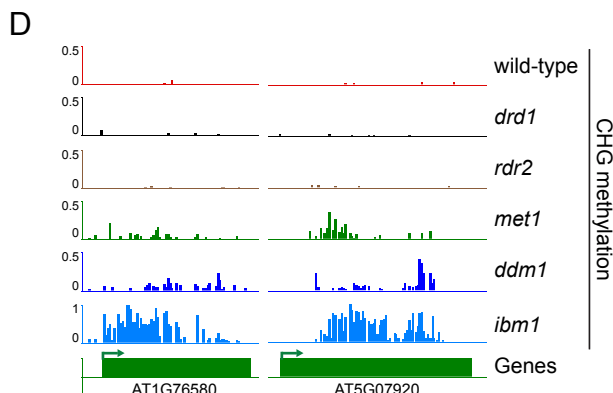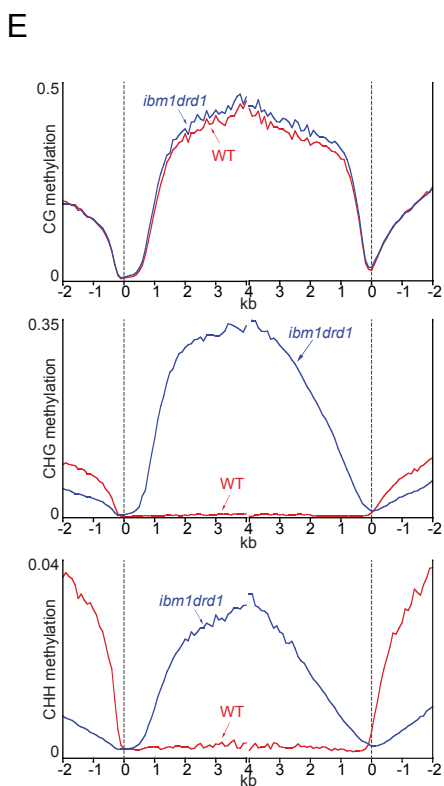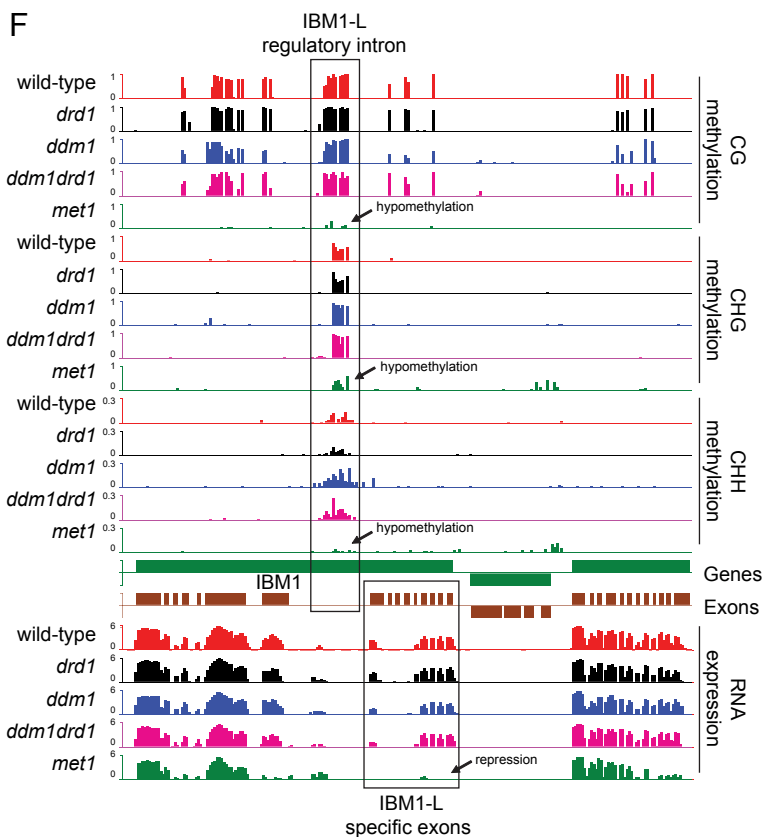

# Supplemental Figure 7

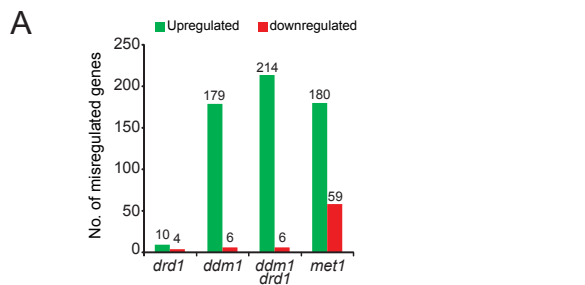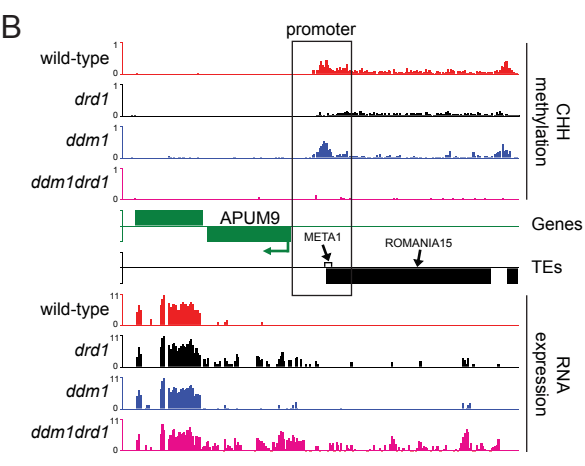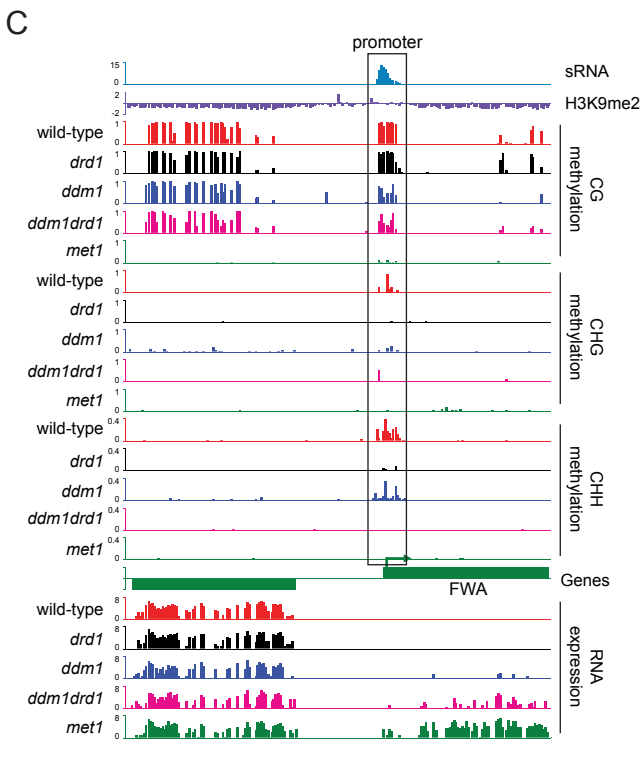

Supplement: NIHMS581063-supplement-02.pdf [file NIHMS581063-supplement-02.pdf]
